# Supplementary material
Source: Elsevier journal article supplement (https://www.sciencedirect.com/science/article/pii/S1885585724000380)

**SUPPLEMENTARY DATA**

**Table 1 of the supplementary data**

Infective endocarditis ICD-10-CM codes

| <b>ICD-10 codes</b> | <b>ICD-10-CM definition</b>                                             |
|---------------------|-------------------------------------------------------------------------|
| B37.6               | Candida endocarditis                                                    |
| I33.0               | Acute and subacute infective endocarditis                               |
| I38                 | Endocarditis, valve unspecified                                         |
| I39                 | Endocarditis and heart valve disorders in diseases classified elsewhere |
| I33.9               | Acute and subacute endocarditis, unspecified                            |

ICD-10-CM, International Classification of Diseases, 10th Revision, Clinical Modification.

**Table 2 of the supplementary data**

ICD-10 codes used for identifying comorbidities, in-hospital complications, procedures, and microbiological information

| <b>Variable</b>                                                                  | <b>Description/ICD-10 codes</b>                                                                                                                                                                                                                                                                                                                                                                                         |
|----------------------------------------------------------------------------------|-------------------------------------------------------------------------------------------------------------------------------------------------------------------------------------------------------------------------------------------------------------------------------------------------------------------------------------------------------------------------------------------------------------------------|
| <b>Comorbidities</b>                                                             |                                                                                                                                                                                                                                                                                                                                                                                                                         |
| Age < 65                                                                         | Mean age minus 65 (years above 65, continuous)                                                                                                                                                                                                                                                                                                                                                                          |
| Male sex                                                                         | Male (%)                                                                                                                                                                                                                                                                                                                                                                                                                |
| Cancer                                                                           | Metastatic cancer and acute leukemia (CC 8), lung and other severe cancers (CC 9)                                                                                                                                                                                                                                                                                                                                       |
| Diabetes mellitus                                                                | Diabetes with acute complications (CC 17), diabetes with chronic complications (CC 18), diabetes without complications (CC 19), diabetic and other vascular retinopathies (CC 123)                                                                                                                                                                                                                                      |
| Protein-calorie malnutrition                                                     | CC 21                                                                                                                                                                                                                                                                                                                                                                                                                   |
| Chronic renal failure                                                            | Chronic kidney disease, stage 5 (CC 136), chronic kidney disease, severe (stage 4) (CC 137), chronic kidney disease, moderate (stage 3) (CC 138), chronic kidney disease, mild or unspecified (stages 1-2 or unspecified) (CC 139), unspecified renal failure (CC 140)                                                                                                                                                  |
| Intravenous drug use                                                             | F11.1, F11.2, F11.9                                                                                                                                                                                                                                                                                                                                                                                                     |
| Cardiac implantable electronic device infection                                  | T82.7                                                                                                                                                                                                                                                                                                                                                                                                                   |
| Presence of a prosthetic heart valve/<br>Infection of a cardiac valve prosthesis | T82.6XXA; Z95.2; Z95.3; Z95.4                                                                                                                                                                                                                                                                                                                                                                                           |
| Cardiac rheumatic disease                                                        | I05; I06; I07; I08                                                                                                                                                                                                                                                                                                                                                                                                      |
| Valvular heart disease, including rheumatic valve disease                        | I05; I06; I07; I08; I34; I35; I36; I37                                                                                                                                                                                                                                                                                                                                                                                  |
| <b>Complications</b>                                                             |                                                                                                                                                                                                                                                                                                                                                                                                                         |
| Cardiogenic shock                                                                | R57.0                                                                                                                                                                                                                                                                                                                                                                                                                   |
| Cardio-respiratory failure                                                       | Cardio-respiratory failure and shock (CC 84), plus ICD-10-CM codes R09.01 and R09.02 within 12 months prior to index (any diagnosis position), except R57.0                                                                                                                                                                                                                                                             |
| Congestive heart failure                                                         | CC 85                                                                                                                                                                                                                                                                                                                                                                                                                   |
| Stroke                                                                           | Cerebral hemorrhage (CC 99), ischemic or unspecified stroke (CC 100)                                                                                                                                                                                                                                                                                                                                                    |
| Acute renal failure                                                              | CC 135                                                                                                                                                                                                                                                                                                                                                                                                                  |
| Arterial embolism                                                                | H34.9; I26.90; I65.1; I63.22; I65.29; I65.09; I63.019; I63.119; I63.219; I65.8; I63.59; I65.8; I63.59; I65.9; I63.20; I66.09; I66.19; I66.29; I66.9; I74.01; I74.09; I74.11; I74.2; I74.3; I74.5; I74.8; I74.9; K55.011; K55.012; K55.019; K55.021; K55.022; K55.029; K55.031; K55.032; K55.039; K55.041; K55.042; K55.049; K55.051; K55.052; K55.059; K55.061; K55.062; K55.069; K55.30; K55.31; K55.32; K55.33; N28.0 |

| Variable                                                                                                                                                                     | Description/ICD-10 codes                                                                                                                                                                                                                                                                                                                                                                                                                                                                                                                                                                                                                                                                                                                                                                                                                                                                                         |
|------------------------------------------------------------------------------------------------------------------------------------------------------------------------------|------------------------------------------------------------------------------------------------------------------------------------------------------------------------------------------------------------------------------------------------------------------------------------------------------------------------------------------------------------------------------------------------------------------------------------------------------------------------------------------------------------------------------------------------------------------------------------------------------------------------------------------------------------------------------------------------------------------------------------------------------------------------------------------------------------------------------------------------------------------------------------------------------------------|
| Septic shock                                                                                                                                                                 | R65.21                                                                                                                                                                                                                                                                                                                                                                                                                                                                                                                                                                                                                                                                                                                                                                                                                                                                                                           |
| <b>Microbiology</b>                                                                                                                                                          |                                                                                                                                                                                                                                                                                                                                                                                                                                                                                                                                                                                                                                                                                                                                                                                                                                                                                                                  |
| <i>Staphylococcus aureus</i>                                                                                                                                                 | B95.61, B95.62                                                                                                                                                                                                                                                                                                                                                                                                                                                                                                                                                                                                                                                                                                                                                                                                                                                                                                   |
| Coagulase-negative staphylococci                                                                                                                                             | B95.7, B95.8                                                                                                                                                                                                                                                                                                                                                                                                                                                                                                                                                                                                                                                                                                                                                                                                                                                                                                     |
| <i>Viridans</i> group streptococci                                                                                                                                           | B95.0, B95.1, B95.4, B95.5                                                                                                                                                                                                                                                                                                                                                                                                                                                                                                                                                                                                                                                                                                                                                                                                                                                                                       |
| Enterococci                                                                                                                                                                  | B95.2                                                                                                                                                                                                                                                                                                                                                                                                                                                                                                                                                                                                                                                                                                                                                                                                                                                                                                            |
| <i>Streptococcus pneumoniae</i>                                                                                                                                              | B95.3                                                                                                                                                                                                                                                                                                                                                                                                                                                                                                                                                                                                                                                                                                                                                                                                                                                                                                            |
| <i>Candida</i> spp                                                                                                                                                           | B37.6                                                                                                                                                                                                                                                                                                                                                                                                                                                                                                                                                                                                                                                                                                                                                                                                                                                                                                            |
| Gram-negative bacilli ( <i>Escherichia coli</i> , <i>Haemophilus influenzae</i> , <i>Klebsiella pneumoniae</i> , <i>Pseudomonas</i> , other gram-negative infectious agents) | B96.20, B96.21, B96.22, B96.23, B96.29, B96.3, B96.1, B96.5                                                                                                                                                                                                                                                                                                                                                                                                                                                                                                                                                                                                                                                                                                                                                                                                                                                      |
| Anaerobes ( <i>Bacteroides fragilis</i> , <i>Clostridium perfringens</i> , other anaerobic bacteria)                                                                         | B96.6, B96.7                                                                                                                                                                                                                                                                                                                                                                                                                                                                                                                                                                                                                                                                                                                                                                                                                                                                                                     |
| Other                                                                                                                                                                        | B95- o B96- not included in previous codes                                                                                                                                                                                                                                                                                                                                                                                                                                                                                                                                                                                                                                                                                                                                                                                                                                                                       |
| Unknown                                                                                                                                                                      | Infective endocarditis without identification of the infectious agent                                                                                                                                                                                                                                                                                                                                                                                                                                                                                                                                                                                                                                                                                                                                                                                                                                            |
| <b>Treatment</b>                                                                                                                                                             |                                                                                                                                                                                                                                                                                                                                                                                                                                                                                                                                                                                                                                                                                                                                                                                                                                                                                                                  |
| Cardiac valve surgery                                                                                                                                                        | 024F07J; 024F08J; 024F0JJ; 024F0KJ; 02BF0ZX; 02BF0ZZ; 02CF0ZZ; 02NF0ZZ; 02QF0ZJ; 02QF0ZZ; 02RF07Z; 02RF08Z; 02RF0JZ; 02RF0KZ; 02UF07J; 02UF07Z; 02UF08J; 02UF08Z; 02UF0JJ; 02UF0JZ; 02UF0KJ; 02UF0KZ; 02WF07Z; 02WF08Z; 02WF0JZ; 02WF0KZ; X2RF032; 024G072; 024G082; 024G0J2; 024G0K2; 02BG0ZX; 02BG0ZZ; 02CG0ZZ; 02NG0ZZ; 02QG0ZE; 02QG0ZZ; 02RG07Z; 02RG08Z; 02RG0JZ; 02RG0KZ; 02UG07E; 02UG07Z; 02UG08E; 02UG08Z; 02UG0JE; 02UG0JZ; 02UG0KE; 02UG0KZ; 02VG0ZZ; 02WG07Z; 02WG08Z; 02WG0JZ; 02WG0KZ; 024J072; 024J082; 024J0J2; 024J0K2; 02BJ0ZX; 02BJ0ZZ; 02CJ0ZZ; 02NJ0ZZ; 02QJ0ZG; 02QJ0ZZ; 02RJ07Z; 02RJ08Z; 02RJ0JZ; 02RJ0KZ; 02UJ07G; 02UJ07Z; 02UJ08G; 02UJ08Z; 02UJ0JG; 02UJ0JZ; 02UJ0KG; 02UJ0KZ; 02WJ07Z; 02WJ08Z; 02WJ0JZ; 02WJ0KZ; 02BH0ZX; 02BH0ZZ; 02CH0ZZ; 02NH0ZZ; 02QH0ZZ; 02RH07Z; 02RH08Z; 02RH0JZ; 02RH0KZ; 02TH0ZZ; 02UH07Z; 02UH08Z; 02UH0JZ; 02UH0KZ; 02WH07Z; 02WH08Z; 02WH0JZ; 02WH0KZ |

CC, condition categories; ICD-10, International Classification of Diseases, 10th Revision.

**Table 3 of the supplementary data**

Baseline characteristics of the matched cohorts for cardiac surgery

|                                                                      | <b>Surgery</b> | <b>No surgery</b> | <b>SDM</b> |
|----------------------------------------------------------------------|----------------|-------------------|------------|
| Age <65                                                              | 54.4           | 55.1              | -0.012     |
| Sex (Female/Male)                                                    | 73.5           | 74.0              | -0.010     |
| Metastatic cancer, acute leukemia, and other severe cancers (CC 8-9) | 1.1            | 1.0               | 0.010      |
| Chronic renal failure (CC 136-140)                                   | 13.3           | 13.1              | 0.006      |
| Cardiac implantable electronic devices infection                     | 7.7            | 8.1               | -0.015     |
| Cardiogenic shock (R57.0)                                            | 5.2            | 6.1               | -0.040     |
| Cardio-respiratory failure (CC 84), except R57.0                     | 25.9           | 24.7              | 0.026      |
| Congestive heart failure (CC 85)                                     | 41.3           | 42.0              | -0.013     |
| Stroke (CC 99-100)                                                   | 6.1            | 5.6               | 0.021      |
| Acute renal failure (CC 135)                                         | 28.4           | 28.6              | -0.004     |
| Septic shock                                                         | 9.7            | 9.3               | 0.013      |
| Enterococci                                                          | 15.2           | 14.5              | 0.019      |
| <i>Staphylococcus aureus</i>                                         | 16.5           | 16.2              | 0.008      |
| <i>Viridans</i> group streptococci                                   | 25.6           | 24.8              | 0.017      |
| <i>Candida</i>                                                       | 0.9            | 0.8               | 0.011      |

CC, condition categories; SDM, standardized difference in means.

**Figure 1 of the supplementary data.** Assessment of discrimination and calibration for the multilevel logistic regression model

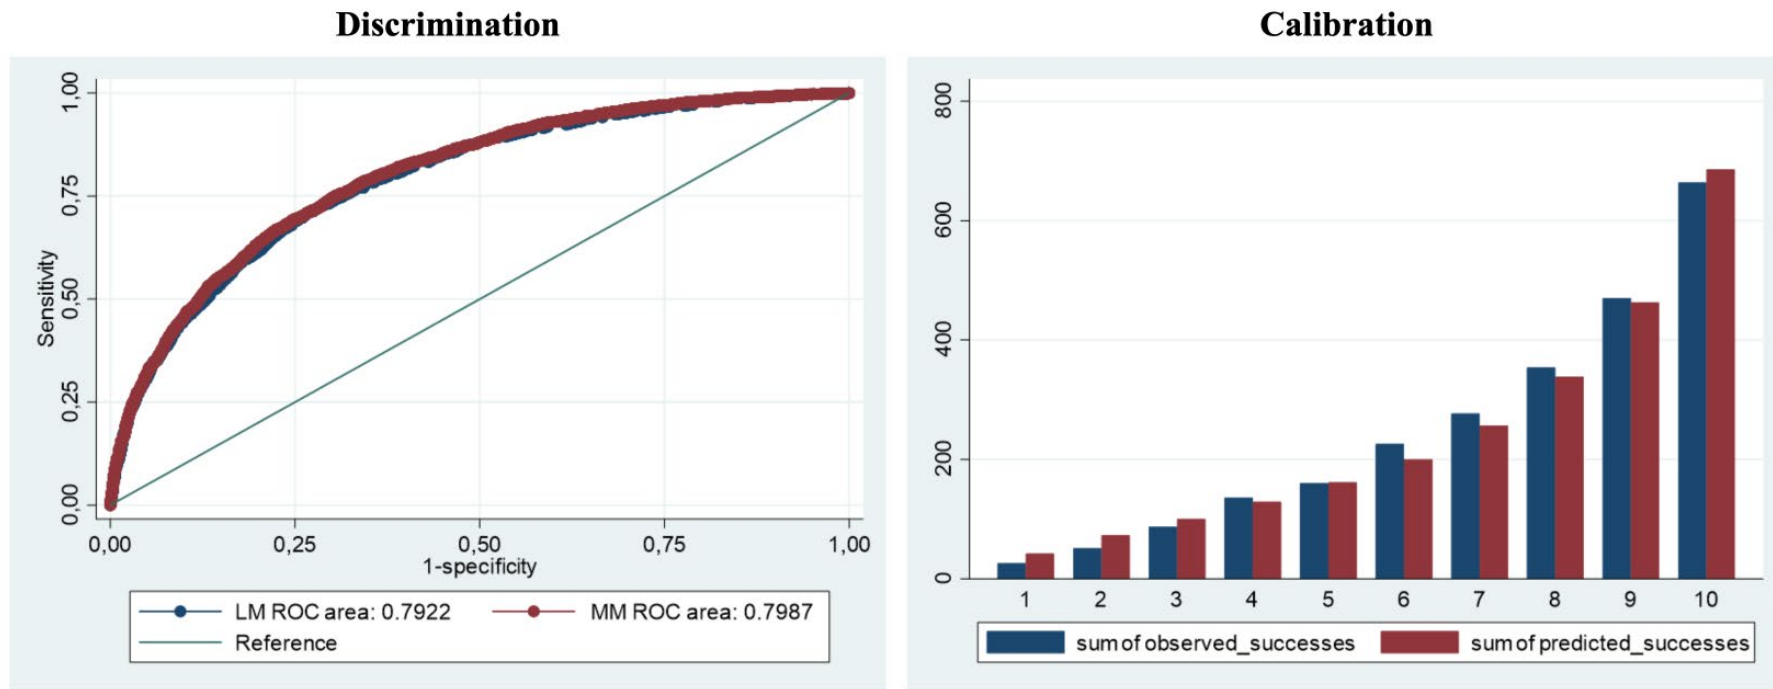

LM ROC, area under the ROC curve for the logistic regression model; MM ROC, area under the ROC curve for the multilevel regression model.

**Figure 2 of the supplementary data.** Kernel Density plots representing the pre- and post- matching. Patients were matched based on the variables depicted in table 3 of the supplementary data

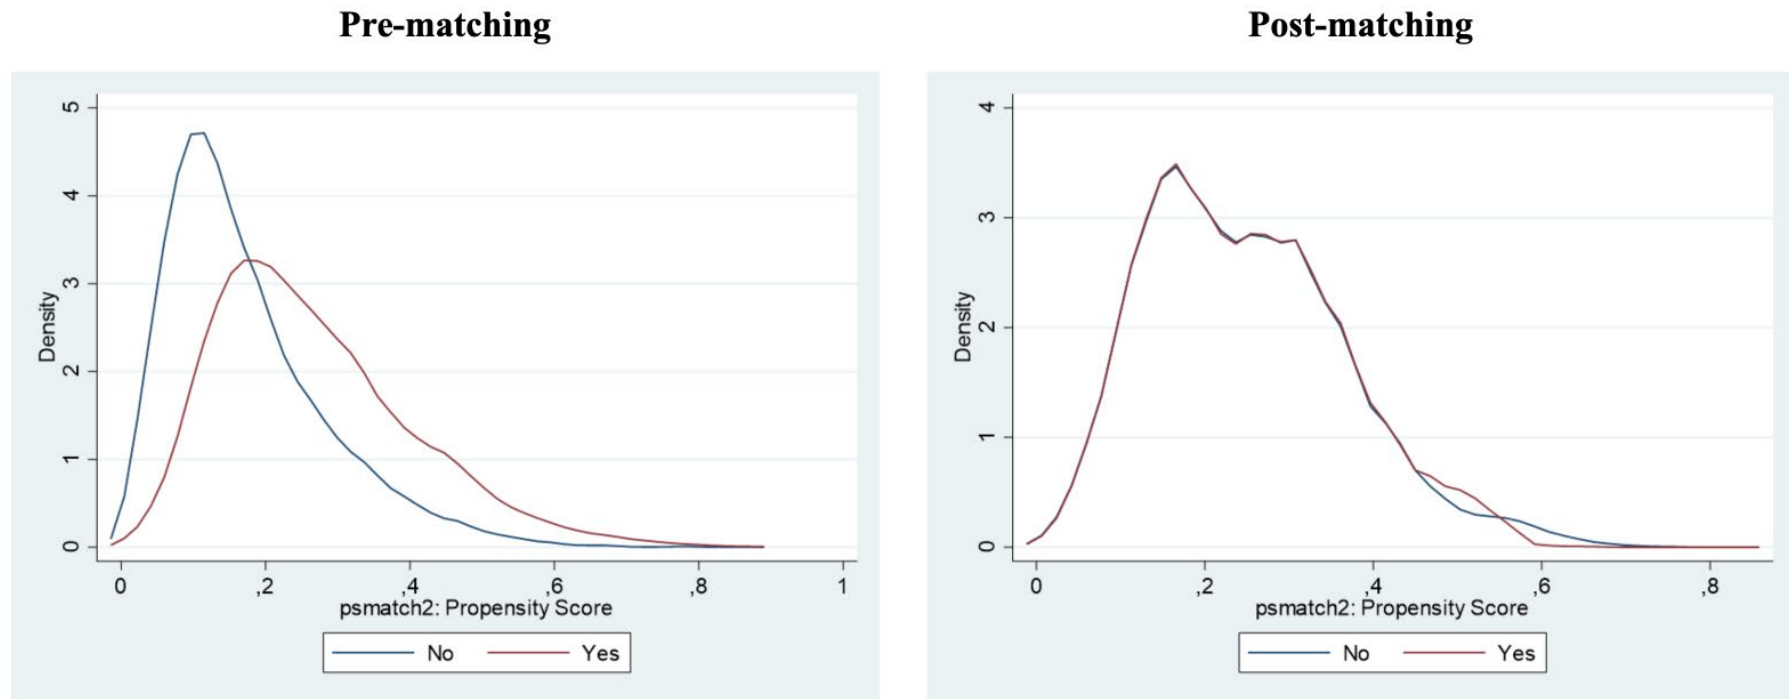

Supplement: mmc1 [file mmc1.pdf]
